# Supplementary material for: Unveiling the role of IGF1R in autism spectrum disorder: a multi-omics approach to decipher common pathogenic mechanisms in the IGF signaling pathway
Source: Frontiers journal article supplement (doi:10.3389/fgene.2024.1483574), 2024-09-23
Supplement: Data_Sheet_1.PDF [file Data_Sheet_1.PDF]

# Supplementary Material

## Supplementary Figures

A

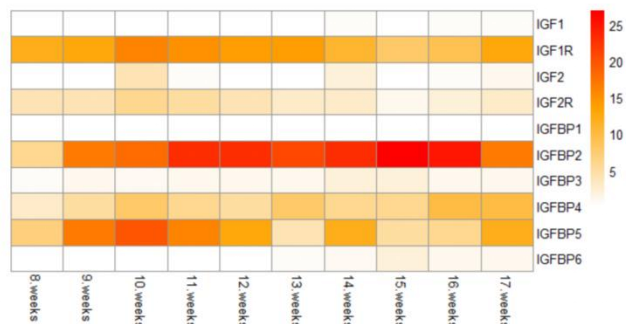

B

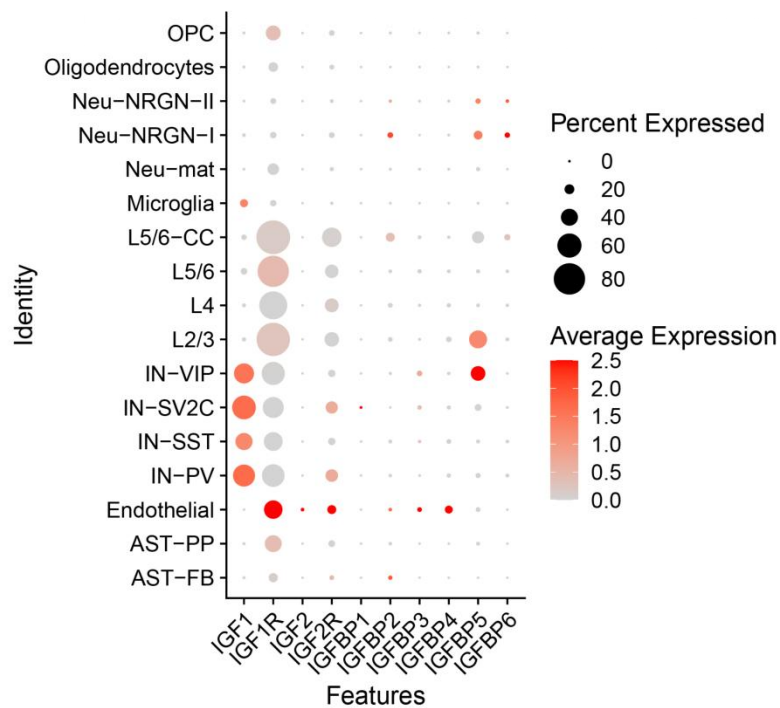

C

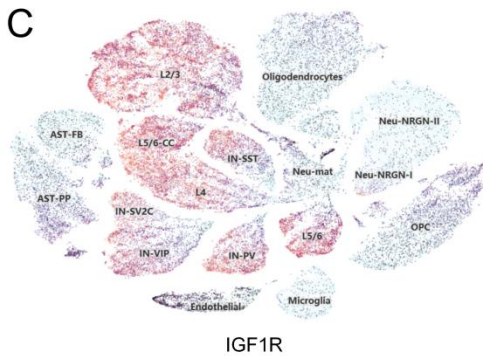

D

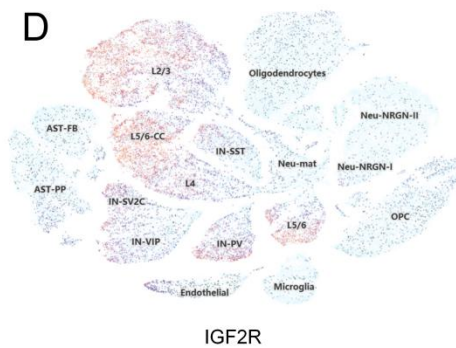

**Supplementary Figure 1. Expression of *IGF1R* and *IGF2R* During Human Embryonic Development and in Postmortem Cortical Tissue**

- A. Heatmap illustrating the high expression levels of *IGF1R* and *IGF2R* in the cerebral cortex during human embryonic development from 8 to 17 weeks. Data from EMBL-EBI database(E-MTAB-4840).
- B. Single-cell transcriptomic analysis of postmortem cortical tissue from children aged 4-7 years, showing high expression levels of *IGF1R* and *IGF2R* in various neuronal subtypes, including L2/3, L4, L5/6, L5/6-CC, IN-VIP, IN-SV2C, IN-SST, and IN-PV neurons. The size of the dots represents the percentage of cells expressing the gene, while the color intensity indicates the average expression level.
- C. Spatial distribution of *IGF1R* expression in the postmortem cortical tissue.
- D. Spatial distribution of *IGF2R* expression in the postmortem cortical tissue.

A

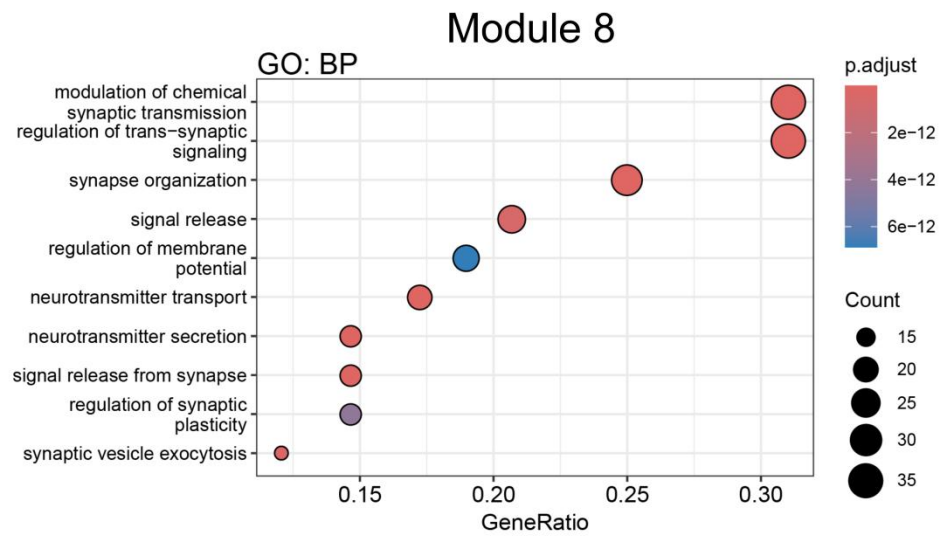

B

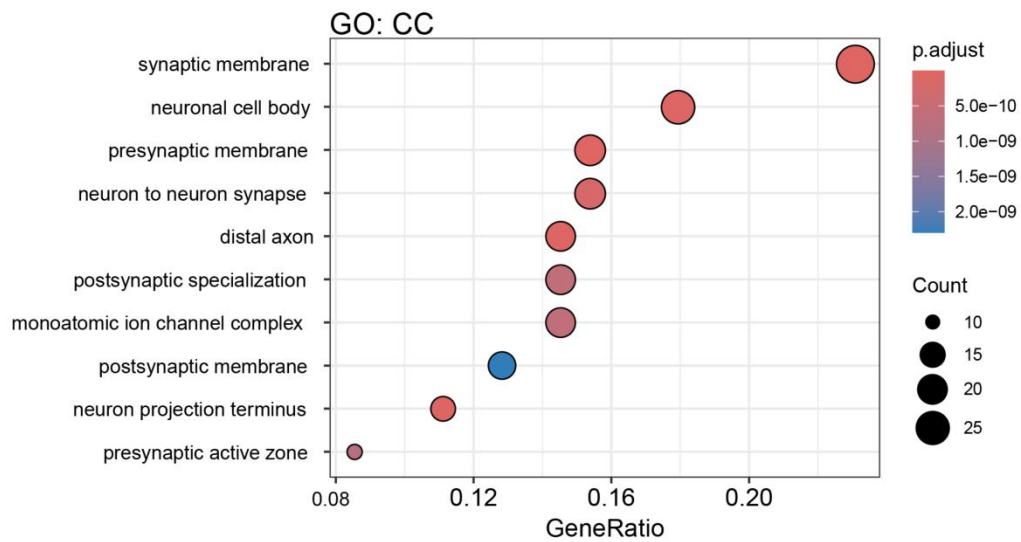

C

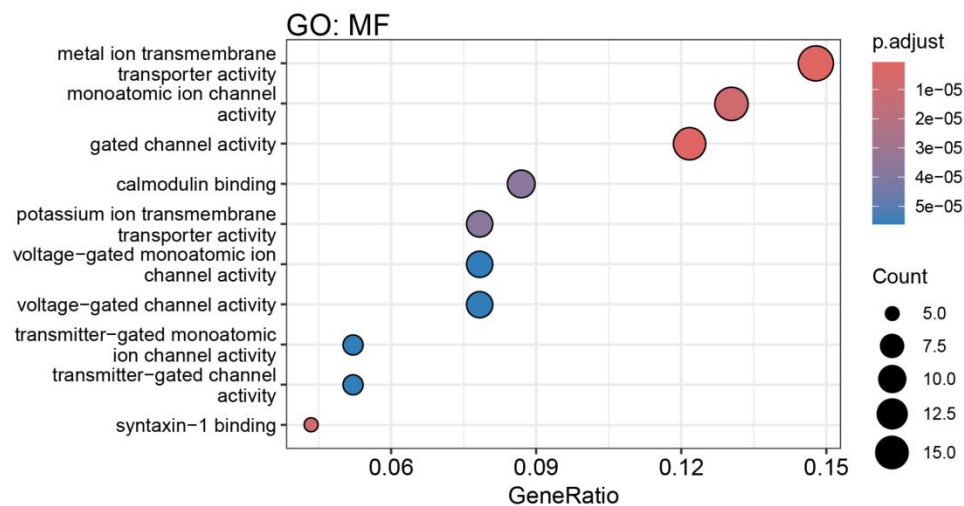

**Supplementary Figure 2. GO Enrichment Analysis of *IGF1R* and Co-Expressed ASD Susceptibility Genes**

A. Gene Ontology (GO) enrichment analysis for biological processes (GO: BP) showing significant enrichment in processes related to synaptic function and neuronal communication, including modulation of chemical synaptic transmission, regulation of neurotransmitter levels, synapse organization, and synaptic vesicle exocytosis.

B. GO enrichment analysis for cellular components (GO: CC) highlighting significant enrichment in components associated with synaptic function, such as the synaptic membrane, presynaptic membrane, postsynaptic membrane, and monoamine ion channel complex.

C. GO enrichment analysis for molecular functions (GO: MF) indicating significant enrichment in functions related to ion channel activity, including metal ion transmembrane transporter activity, monoatomic ion channel activity, and various gated channel activities.

A

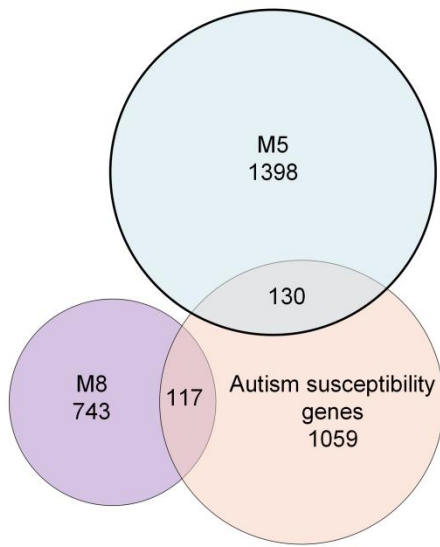

B

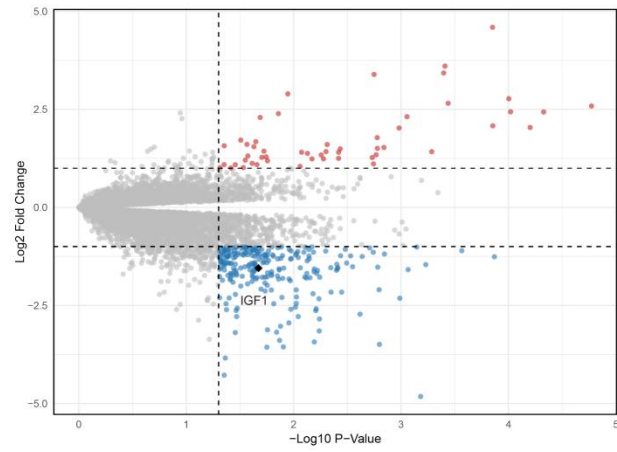

C

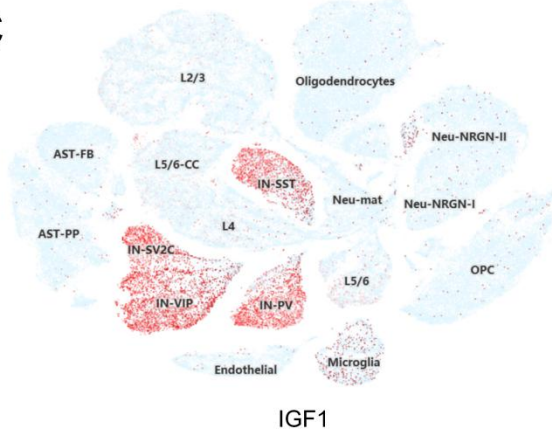

D

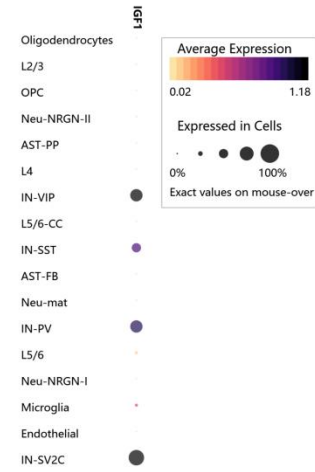

E

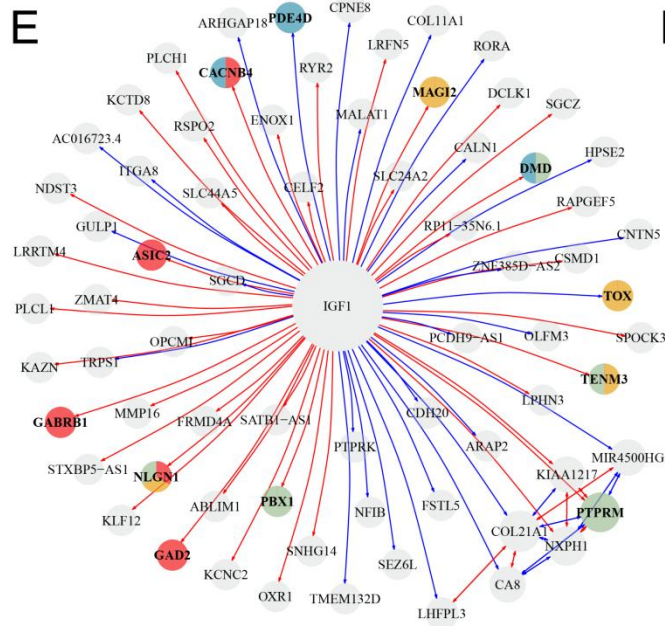

F

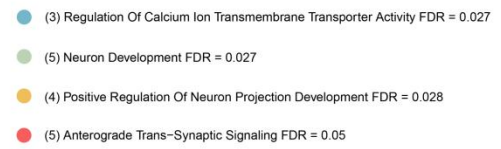

**Supplementary Figure 3. Analysis of *IGF1* and Its Role in Autism and Neuronal Development**

- A. Venn diagram showing the overlap of genes in modules M5 and M8 with known autism susceptibility genes.
- B. Transcriptomic analysis of brain organoids derived from autism patients, demonstrating significant downregulation of *IGF1* on day 11 of in vitro culture.
- C. Single-cell transcriptomic analysis of postmortem brain cortex from children aged 4-7 years, indicating that *IGF1* is highly expressed only in interneurons, particularly in IN-PV neurons.
- D. Dot plot showing the average expression levels of *IGF1* in various cell types, highlighting its high expression in IN-PV neurons.
- E. Differential expression analysis following *IGF1* knockout in IN-PV neurons, revealing enrichment of genes involved in neuronal development.
- F. GO enrichment analysis of differentially expressed genes following *IGF1* knockout, showing significant enrichment in processes related to neuronal development, regulation of calcium ion transmembrane transporter activity, and synaptic signaling.

## Module 5

A

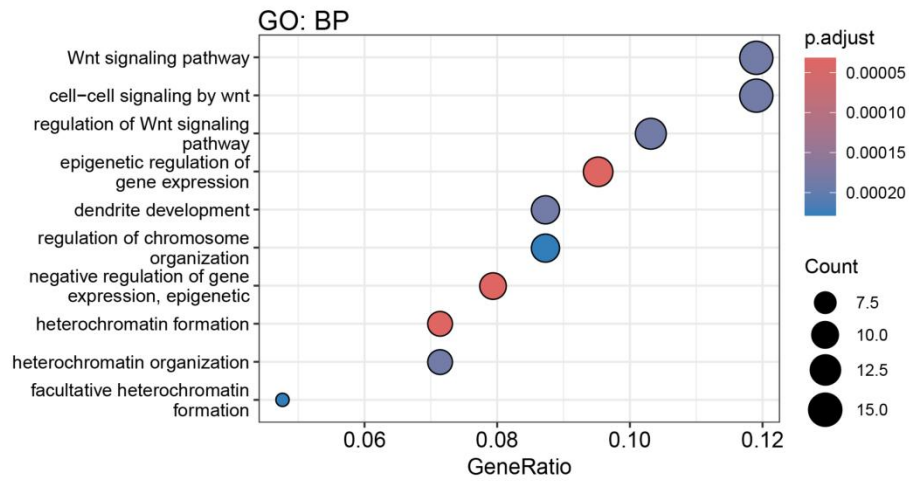

B

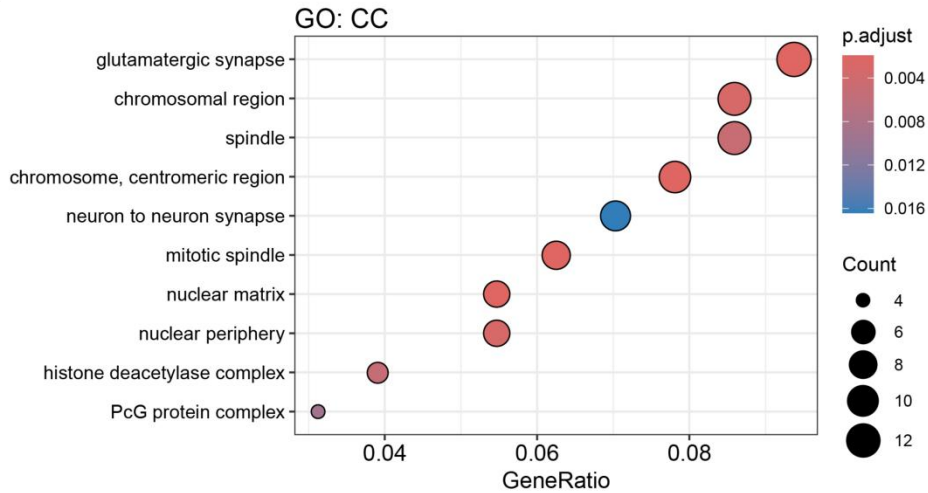

C

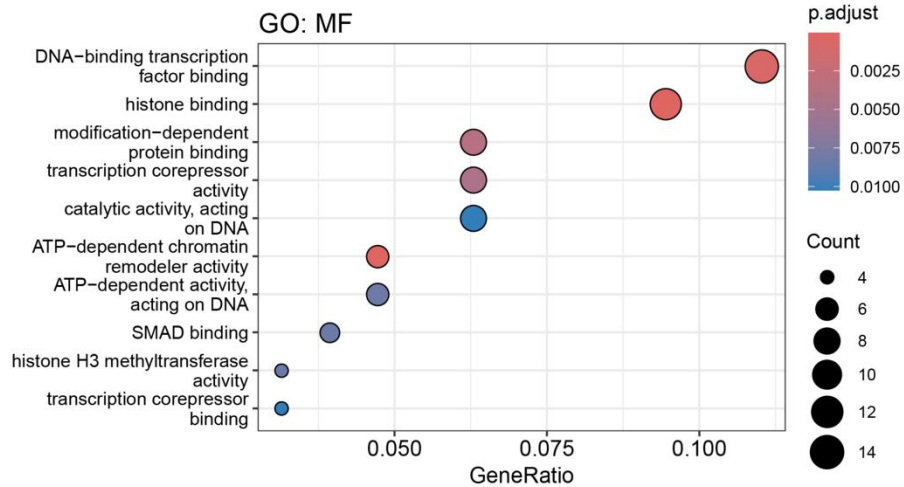

**Supplementary Figure 4. GO Enrichment Analysis of Module 5 in Brain Organoids Derived from Autism Patients**

A. Gene Ontology (GO) Biological Process (BP) enrichment analysis of genes in module 5, which includes *IGF1* and other autism susceptibility genes. The analysis reveals significant enrichment in processes such as Wnt signaling pathway, cell-cell signaling by Wnt, epigenetic regulation of gene expression, and dendrite development, suggesting a role in neural development during early stages.

B. GO Cellular Component (CC) enrichment analysis of genes in module 5, indicating significant associations with components such as the glutamatergic synapse, chromosomal region, mitotic spindle, nuclear matrix, and histone deacetylase complex, which are crucial for chromosomal organization and synaptic function.

C. GO Molecular Function (MF) enrichment analysis of genes in module 5, highlighting significant enrichment in functions such as DNA-binding transcription factor activity, histone binding, transcription coactivator binding, and ATP-dependent chromatin remodeling, implicating these genes in the regulation of transcription and chromatin structure within the nucleus.



A

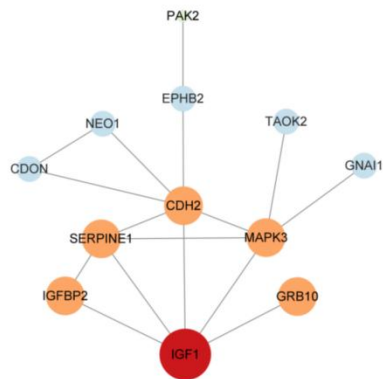

B

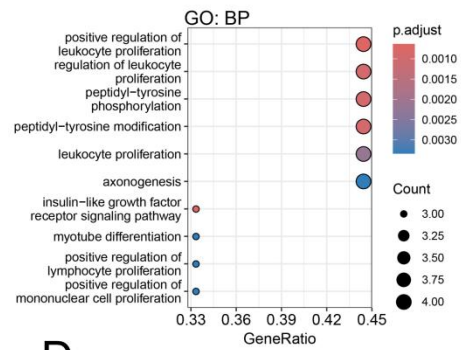

C

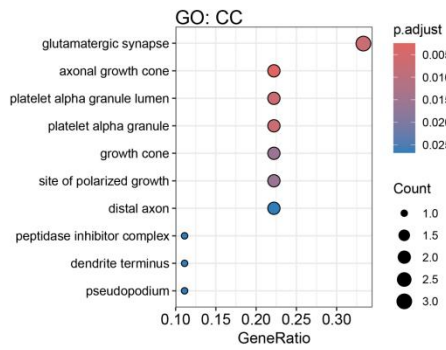

D

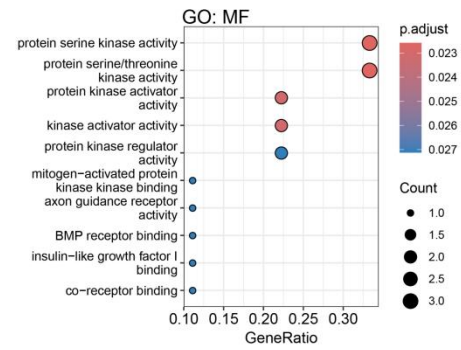

E

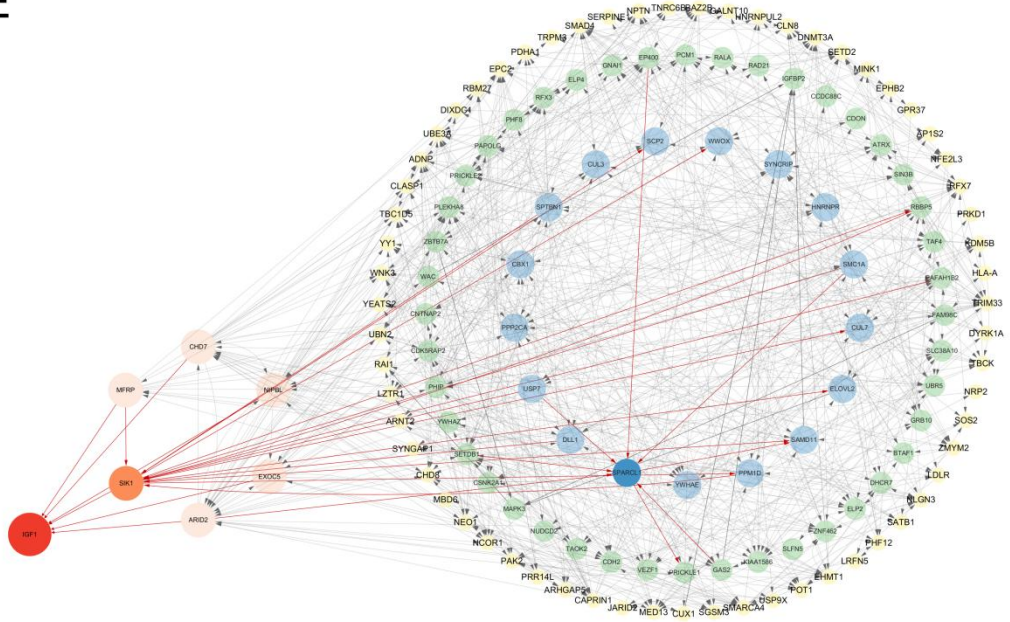

**Supplementary Figure 5. Protein Interaction and Regulatory Network Analysis of *IGF1* in Brain Organoids Derived from Autism Patients**

A. Protein interaction network showing *IGF1* clustering with proteins involved in synaptic growth. Key interactions include those influencing protein serine/threonine kinase activity within glutamatergic synapses and axonal growth cones.

B. Gene Ontology (GO) Biological Process (BP) enrichment analysis of proteins interacting with *IGF1*, highlighting significant processes such as positive regulation of synapse assembly, peptidyl-tyrosine phosphorylation, and leukocyte proliferation, which are critical for synaptic development and immune responses.

C. GO Cellular Component (CC) enrichment analysis of proteins interacting with *IGF1*, indicating significant associations with components such as the glutamatergic synapse, axonal growth cone, and postsynaptic density, which are essential for synaptic signaling and axonal guidance.

D. GO Molecular Function (MF) enrichment analysis of proteins interacting with *IGF1*, revealing significant enrichment in functions such as protein serine/threonine kinase activity, protein kinase binding, and insulin-like growth factor binding, implicating these proteins in signaling pathways that regulate synaptic and axonal growth.

E. Regulatory network inference using the Genie3 algorithm, identifying direct regulation of *IGF1* by *SIK1*, *MFRP*, *CHD7*, *NIPBL*, *EXOC5*, and *ARID2*. Notably, *SIK1* and *SPARCL1* are significantly downregulated in autism brain organoids, potentially affecting *IGF1* expression and its downstream effects on neural development. Genes highlighted in the network are those significantly differentially expressed in autism brain organoids. Connections originating from or pointing to these genes are marked in red.
